# Supplementary material
Source: publisher site journal article supplement (https://www.spandidos-publications.com/8377/downloadSupplementary)
Supplement: Supplementary file 1 [file downloadSupplementary]

## Sheet: Sheet1
Table SVII. Genes (n=33) associated with ferroptosis
NCBI geneID	Gene symbol	Description
6520	SLC3A2	solute carrier family 3 member 2
23657	SLC7A11	solute carrier family 7 member 11
7157	TP53	tumor protein p53
2729	GCLC	glutamate-cysteine ligase catalytic subunit
2730	GCLM	glutamate-cysteine ligase modifier subunit
2937	GSS	glutathione synthetase
2879	GPX4	glutathione peroxidase 4
2182	ACSL4	acyl-CoA synthetase long chain family member 4
10162	LPCAT3	lysophosphatidylcholine acyltransferase 3
246	ALOX15	arachidonate 15-lipoxygenase
6303	SAT1	spermidine/spermine N1-acetyltransferase 1
7018	TF	transferrin
7037	TFRC	transferrin receptor
55240	STEAP3	STEAP3 metalloreductase
4891	SLC11A2	solute carrier family 11 member 2
64116	SLC39A8	solute carrier family 39 member 8
23516	SLC39A14	solute carrier family 39 member 14
5094	PCBP2	poly(rC) binding protein 2
30061	SLC40A1	solute carrier family 40 member 1
1356	CP	ceruloplasmin
5093	PCBP1	poly(rC) binding protein 1
2495	FTH1	ferritin heavy chain 1
2512	FTL	ferritin light chain
392288	MAP1LC	microtubule associated protein 1 light chain 3 beta pseudogene 1
9474	ATG5	autophagy related 5
10533	ATG7	autophagy related 7
8031	NCOA4	nuclear receptor coactivator 4
5621	PRNP	prion protein (Kanno blood group)
3162	HMOX1	heme oxygenase 1
7417	VDAC2	voltage dependent anion channel 2
7419	VDAC3	voltage dependent anion channel 3
1356	CYBB	cytochrome b-245 beta chain
94033	FTMT	ferritin mitochondrial
